# Supplementary material
Source: PubMed Central journal article supplement (PMC7831806)
Supplement: mmc1.pdf [file mmc1.pdf]

# THE LANCET Psychiatry

## Supplementary appendix 1

This appendix formed part of the original submission. We post it as supplied by the authors.

Supplement to: Pan K-Y, Kok AAL, Eikelenboom M, et al. The mental health impact of the COVID-19 pandemic on people with and without depressive, anxiety, or obsessive-compulsive disorders: a longitudinal study of three Dutch case-control cohorts. *Lancet Psychiatry* 2020; published online Dec 8. [http://dx.doi.org/10.1016/S2215-0366\(20\)30491-0](http://dx.doi.org/10.1016/S2215-0366(20)30491-0).

This translation in Dutch was submitted by the authors and we reproduce it as supplied. It has not been peer reviewed. *The Lancet's* editorial processes have only been applied to the original in English, which should serve as reference for this manuscript.

Deze vertaling in het Nederlands werd door de auteurs toegevoegd en we reproduceren de tekst zoals deze werd aangeleverd. Dit Nederlandstalig abstract onderging geen peer review. Het redactioneel proces van The Lancet werd enkel uitgevoerd op de originele Engelse tekst, welke geldt als de referentie voor dit artikel.

## **De invloed van de COVID-19-pandemie op personen met en zonder depressieve-, angst- of obsessief-compulsieve stoornissen: een longitudinale studie in drie Nederlandse case-control-cohorten**

Achtergrond. Het is onduidelijk hoe de COVID-19-pandemie de mentale gezondheid van mensen met (eerdere) psychische stoornissen beïnvloedt. In drie bestaande psychiatrische case-control cohorten vergeleken we de ervaren invloed van de pandemie op de mentale gezondheid en 'coping' tussen mensen met en zonder lifetime depressieve-, angst- of obsessief-compulsieve stoornissen. Ook vergeleken we hun niveau van depressieve symptomen, angst, piekeren en eenzaamheid vóór en na de uitbraak van COVID-19.

Methoden. Tussen 1 april en 13 mei 2020 werden online vragenlijsten uitgezet in de Nederlandse Studie naar Depressie en Angst, de Nederlandse Studie naar Depressie bij Ouderen, en de Nederlandse Obsessief-Compulsieve Stoornis Associatie studie. In totaal werden 1181 respondenten met en 336 personen zonder deze stoornissen geïnccludeerd. De lijst bevatten vragen over de ervaren invloed op de mentale gezondheid, angst voor COVID-19, coping, en vier gevalideerde meetinstrumenten van depressieve symptomen, angst, piekeren en eenzaamheid die eerder in de periode 2006-16 ook waren afgenomen. Het aantal stoornissen en de mate van chroniciteit werden vastgesteld op basis van diagnoses uit eerdere meetmomenten. Lineaire regressie en mixed models werden toegepast.

Resultaten. Een hoger aantal en meer chroniciteit van stoornissen gingen gepaard met een grotere ervaren impact op de mentale gezondheid, meer angst voor COVID-19 en minder coping. Hoewel respondenten met stoornissen zowel vóór als tijdens de pandemie hoger scoorden op alle vier de symptoom-schalen dan respondenten zonder stoornissen, namen deze symptomen niet (sterker) toe ten opzichte van het niveau van vóór de pandemie. Bij respondenten zonder stoornissen namen de symptomen zelfs de grootste toename te zien, terwijl ze bij respondenten met het hoogste aantal en de meest chronische psychische stoornissen enigszins afnamen.

Conclusie. Personen met depressieve-, angst- of obsessief-compulsieve stoornissen ervaren een negatieve invloed van de COVID-19-pandemie op hun mentale gezondheid en coping, hetgeen monitoring en aandacht in de klinische praktijk vergt. De pandemie lijkt echter de ernst van hun symptomen niet verder te vergroten in vergelijking met het niveau van vóór de pandemie.
