# Supplementary material
Source: PubMed Central journal article supplement (PMC7831806)
Supplement: mmc2.pdf [file mmc2.pdf]

# THE LANCET Psychiatry

## Supplementary appendix 2

This appendix formed part of the original submission and has been peer reviewed. We post it as supplied by the authors.

Supplement to: Pan K-Y, Kok AAL, Eikelenboom M, et al. The mental health impact of the COVID-19 pandemic on people with and without depressive, anxiety, or obsessive-compulsive disorders: a longitudinal study of three Dutch case-control cohorts. *Lancet Psychiatry* 2020; published online Dec 8. [http://dx.doi.org/10.1016/S2215-0366\(20\)30491-0](http://dx.doi.org/10.1016/S2215-0366(20)30491-0).

**Supplementary Table 1: Individual Covid-19-specific items and Exploratory Factor Analysis results**

| <b>Item (response options: 1=totally disagree – 5=totally agree)</b>                   | <b>N</b> | <b>Factor loading 1</b>        | <b>Factor loading 2</b> | <b>Factor loading 3</b> |
|----------------------------------------------------------------------------------------|----------|--------------------------------|-------------------------|-------------------------|
| Because of this period the quality of my sleep is worse                                | 1482     | .56                            | .23                     | -.07                    |
| This period makes me consume more snacks or sweets                                     | 1485     | .43                            | -.07                    | .05                     |
| This period makes me drink more alcohol <sup>a)</sup>                                  | 1148     | .35                            | -.11                    | <.01                    |
| This period makes me more emotional                                                    | 1479     | .65                            | .21                     | .02                     |
| In this period I am having more nightmares                                             | 1446     | .57                            | .15                     | -.06                    |
| In this period it is hard to concentrate                                               | 1485     | .60                            | .11                     | -.20                    |
| In this period I am more often lonely                                                  | 1480     | .33                            | .14                     | -.39 <sup>b)</sup>      |
| This period makes me sad                                                               | 1486     | .56                            | .20                     | -.32                    |
| In this period I am more often irritable and tense                                     | 1485     | .64                            | .12                     | -.15                    |
| I fear to become infected with corona                                                  | 1476     | .05                            | .66                     | .06                     |
| Because of the threat of the virus I dont leave my home anymore                        | 1473     | -.02                           | .51                     | -.22                    |
| This period makes me fearful                                                           | 1486     | .33                            | .56                     | -.14                    |
| I intensively follow the news about the virus through TV newspaper and or social media | 1492     | .02                            | .27                     | .03                     |
| Because of the threat of the virus I am anxious of getting close to other people       | 1484     | .06                            | .75                     | -.03                    |
| I strictly follow the rules to prevent contamination and spread of the virus           | 1488     | -.09                           | .48                     | .14                     |
| In this period I feel more connected to society                                        | 1486     | .12                            | .12                     | .46                     |
| It is no problem to enjoy myself while being at home more often                        | 1449     | -.08                           | <.01                    | .54                     |
| I have confidence that the Netherlands will overcome this crisis                       | 1490     | -.08                           | -.07                    | .37                     |
| Despite the virus I stay active (household tasks, gardening, walking, sporting, yoga)  | 1478     | -.14                           | -.11                    | .50                     |
| Despite the virus I actively maintain (via phone or online) contacts with friends      | 1486     | -.02                           | .06                     | .53                     |
| Dimension label                                                                        |          | Perceived mental health impact | Fear for COVID-19       | Positive coping         |
| Cronbach's alpha                                                                       |          | .85 (n=1476)                   | .73 (n=1484)            | .61 (n=1487)            |

a) Non-drinkers answered “not applicable” (coded as missing value)

b) Because the item wording more closely resembled other aspects usually linked to mental health rather than perceived coping items, we included this item in the perceived mental health impact dimension

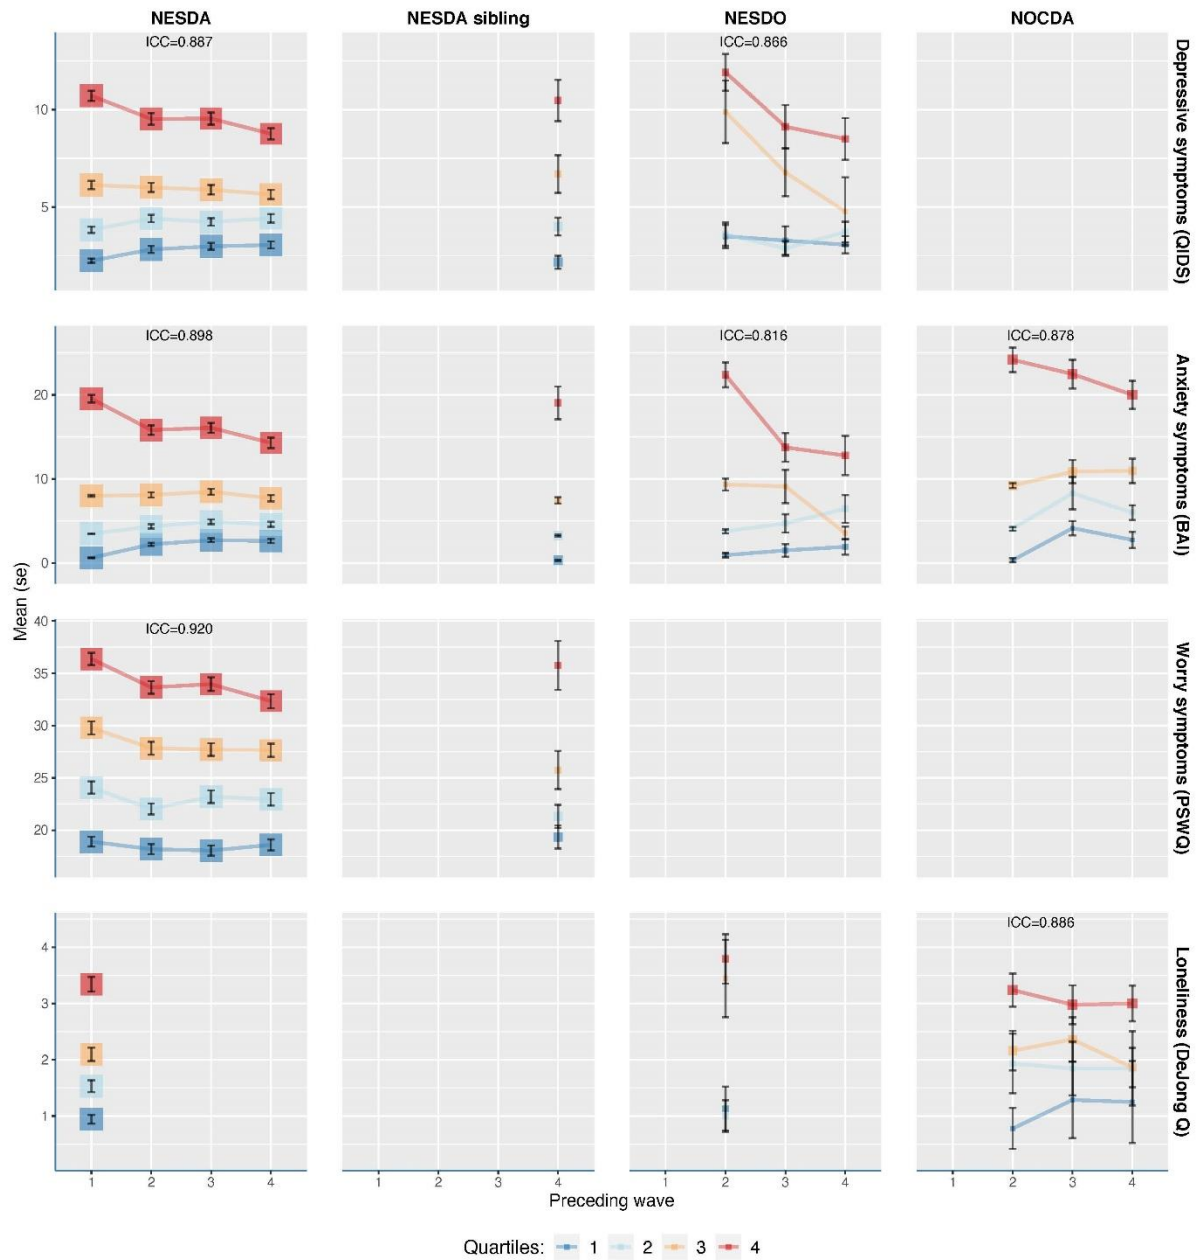

**Supplementary Figure 1: Mean symptom scale scores over time for the up to four preceding waves dating back to 2006.** X axis refers to assessment waves prior to the COVID-19 outbreak. Participants were categorized according to quartiles based on the symptom severity scores at the earliest wave of each cohort. Error bars represent standard errors of the mean, and each box is proportional to the number of subjects at that time point. There was evidence of substantial rank-order stability over the waves of follow-up, with high intra-class correlation (ICC) values.

**Supplementary Table 2: Dimensions in the COVID-specific items in relation to specific mental disorders**

| COVID-19-specific dimension:           | n   | Crude mean (SE) | Adjusted standardized score; mean (SE) | t-statistic | p-value  |
|----------------------------------------|-----|-----------------|----------------------------------------|-------------|----------|
| <b>Perceived mental health impact:</b> |     |                 |                                        |             |          |
| Major depressive disorder              | 978 | 2.70 ± 0.76     | 0.24 ± 0.04                            | 5.515       | < 0.0001 |
| Dysthymic disorder                     | 370 | 2.80 ± 0.78     | 0.08 ± 0.05                            | 1.562       | 0.12     |
| Panic disorder                         | 483 | 2.78 ± 0.75     | 0.06 ± 0.05                            | 1.293       | 0.20     |
| Generalized anxiety disorder           | 456 | 2.84 ± 0.74     | 0.22 ± 0.04                            | 4.809       | < 0.0001 |
| Agoraphobia                            | 405 | 2.81 ± 0.74     | 0.10 ± 0.05                            | 1.903       | 0.057    |
| Social anxiety disorder                | 522 | 2.79 ± 0.75     | 0.16 ± 0.04                            | 3.745       | 0.0002   |
| Obsessive-compulsive disorder          | 121 | 2.80 ± 0.85     | 0.26 ± 0.07                            | 3.880       | 0.0001   |
| <b>Fear of Covid-19:</b>               |     |                 |                                        |             |          |
| Major depressive disorder              | 984 | 3.30 ± 0.74     | 0.09 ± 0.04                            | 2.008       | 0.045    |
| Dysthymic disorder                     | 372 | 3.37 ± 0.75     | 0.03 ± 0.05                            | 0.611       | 0.54     |
| Panic disorder                         | 486 | 3.40 ± 0.71     | 0.09 ± 0.05                            | 1.965       | 0.050    |
| Generalized anxiety disorder           | 458 | 3.36 ± 0.75     | 0.09 ± 0.04                            | 1.976       | 0.048    |
| Agoraphobia                            | 409 | 3.43 ± 0.70     | 0.14 ± 0.05                            | 2.769       | 0.0057   |
| Social anxiety disorder                | 526 | 3.36 ± 0.69     | 0.07 ± 0.04                            | 1.564       | 0.12     |
| Obsessive-compulsive disorder          | 123 | 3.37 ± 0.83     | 0.23 ± 0.07                            | 3.516       | 0.0005   |
| <b>Positive coping:</b>                |     |                 |                                        |             |          |
| Major depressive disorder              | 987 | 3.63 ± 0.63     | -0.09 ± 0.04                           | -2.617      | 0.0090   |
| Dysthymic disorder                     | 372 | 3.48 ± 0.66     | -0.18 ± 0.04                           | -4.508      | < 0.0001 |
| Panic disorder                         | 485 | 3.58 ± 0.65     | -0.02 ± 0.04                           | -0.637      | 0.52     |
| Generalized anxiety disorder           | 458 | 3.55 ± 0.65     | -0.09 ± 0.04                           | -2.342      | 0.019    |
| Agoraphobia                            | 409 | 3.55 ± 0.66     | -0.06 ± 0.04                           | -1.414      | 0.16     |
| Social anxiety disorder                | 526 | 3.55 ± 0.67     | -0.11 ± 0.04                           | -3.069      | 0.0022   |
| Obsessive-compulsive disorder          | 123 | 3.56 ± 0.64     | -0.18 ± 0.06                           | -3.324      | 0.0009   |

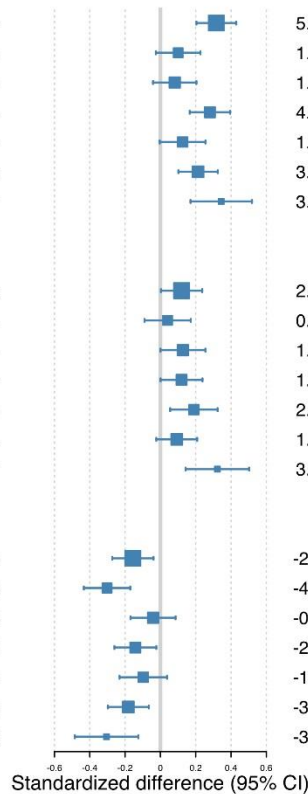

The crude mean refers to the mean score in each dimension of persons with the disorder. Persons could have multiple comorbid disorders. To create the forest plot, each COVID-19-specific dimension score was standardised. The adjusted standardised score refers to the mean score among the persons with that disorder, adjusted for all the other dummy variables indicating other disorders entered into one linear regression model, and additionally adjusted for age, sex, education, living situation, and date of response.

**Supplementary Table 3: Change in symptoms from before to during the COVID-19 pandemic in relation to specific mental disorders**

| Independent variable:              | n   | Baseline mean | Covid mean | Crude change (SE) | p-value | Adjusted change (SE) | t-stat | p-value |
|------------------------------------|-----|---------------|------------|-------------------|---------|----------------------|--------|---------|
| <b>Depressive symptoms (QIDS):</b> |     |               |            |                   |         |                      |        |         |
| Major depressive disorder          | 894 | 6.94          | 7.02       | 0.09 ± 0.21       | 0.67    | 0.02 ± 0.32          | 0.056  | 0.96    |
| Dysthymic disorder                 | 369 | 9.01          | 8.53       | -0.49 ± 0.35      | 0.17    | -0.77 ± 0.35         | -2.181 | 0.029   |
| Panic disorder                     | 448 | 7.45          | 7.38       | -0.08 ± 0.30      | 0.80    | -0.04 ± 0.35         | -0.111 | 0.91    |
| Generalized anxiety disorder       | 434 | 8.09          | 7.91       | -0.18 ± 0.31      | 0.55    | -0.21 ± 0.33         | -0.629 | 0.53    |
| Agoraphobia                        | 379 | 7.74          | 7.57       | -0.17 ± 0.34      | 0.62    | -0.16 ± 0.37         | -0.442 | 0.66    |
| Social anxiety disorder            | 491 | 7.80          | 7.61       | -0.19 ± 0.29      | 0.52    | -0.35 ± 0.32         | -1.075 | 0.28    |
| <b>Anxiety symptoms (BAI):</b>     |     |               |            |                   |         |                      |        |         |
| Major depressive disorder          | 984 | 10.16         | 10.09      | -0.06 ± 0.41      | 0.88    | 0.03 ± 0.63          | 0.041  | 0.97    |
| Dysthymic disorder                 | 373 | 12.75         | 12.04      | -0.71 ± 0.69      | 0.30    | -0.64 ± 0.70         | -0.921 | 0.36    |
| Panic disorder                     | 481 | 12.75         | 12.26      | -0.49 ± 0.66      | 0.46    | -0.57 ± 0.69         | -0.829 | 0.41    |
| Generalized anxiety disorder       | 456 | 12.51         | 12.02      | -0.50 ± 0.64      | 0.44    | -0.39 ± 0.64         | -0.612 | 0.54    |
| Agoraphobia                        | 404 | 13.15         | 12.82      | -0.33 ± 0.73      | 0.65    | 0.14 ± 0.72          | 0.189  | 0.85    |
| Social anxiety disorder            | 523 | 12.26         | 11.84      | -0.42 ± 0.60      | 0.48    | -0.40 ± 0.62         | -0.640 | 0.52    |
| Obsessive-compulsive disorder      | 120 | 14.03         | 14.92      | 0.89 ± 1.51       | 0.56    | 0.68 ± 0.97          | 0.697  | 0.49    |
| <b>Worry symptoms (PSWQ):</b>      |     |               |            |                   |         |                      |        |         |
| Major depressive disorder          | 852 | 28.86         | 28.90      | 0.04 ± 0.49       | 0.93    | -1.02 ± 0.81         | -1.256 | 0.21    |
| Dysthymic disorder                 | 343 | 32.80         | 32.04      | -0.77 ± 0.77      | 0.32    | -0.94 ± 0.89         | -1.050 | 0.29    |
| Panic disorder                     | 428 | 30.75         | 30.64      | -0.11 ± 0.70      | 0.88    | 0.35 ± 0.88          | 0.400  | 0.69    |
| Generalized anxiety disorder       | 419 | 32.51         | 32.17      | -0.34 ± 0.69      | 0.62    | -0.45 ± 0.82         | -0.547 | 0.58    |
| Agoraphobia                        | 360 | 31.12         | 30.33      | -0.79 ± 0.78      | 0.31    | -1.41 ± 0.93         | -1.522 | 0.13    |
| Social anxiety disorder            | 471 | 30.82         | 30.51      | -0.31 ± 0.66      | 0.64    | -0.48 ± 0.81         | -0.596 | 0.55    |
| <b>Loneliness (DeJong Q):</b>      |     |               |            |                   |         |                      |        |         |
| Major depressive disorder          | 886 | 2.41          | 2.56       | 0.15 ± 0.10       | 0.12    | 0.03 ± 0.17          | 0.153  | 0.88    |
| Dysthymic disorder                 | 336 | 3.08          | 2.90       | -0.17 ± 0.16      | 0.28    | -0.43 ± 0.18         | -2.392 | 0.017   |
| Panic disorder                     | 439 | 2.58          | 2.67       | 0.08 ± 0.14       | 0.56    | 0.04 ± 0.18          | 0.239  | 0.81    |
| Generalized anxiety disorder       | 413 | 2.75          | 2.78       | 0.03 ± 0.14       | 0.82    | -0.05 ± 0.17         | -0.273 | 0.78    |
| Agoraphobia                        | 363 | 2.76          | 2.75       | -0.01 ± 0.15      | 0.95    | -0.14 ± 0.19         | -0.730 | 0.47    |
| Social anxiety disorder            | 465 | 2.88          | 2.84       | -0.04 ± 0.14      | 0.77    | -0.26 ± 0.16         | -1.583 | 0.11    |
| Obsessive-compulsive disorder      | 124 | 2.50          | 2.70       | 0.20 ± 0.26       | 0.43    | -0.13 ± 0.24         | -0.563 | 0.57    |

Standardized change (SE) (95% CI)

The baseline mean refers to the mean of average score across the preceding pre-COVID waves of persons with the disorder. The Covid mean refers to the mean score of persons with the disorder at the online COVID wave. The crude change with the p-value refers to the difference in mean score between pre-COVID wave and online COVID wave of persons with the disorder. To create the forest plot, each change in symptom score was standardised. The adjusted change with the p-value was derived from mixed models where all the interaction terms of dummy variables indicating disorders with time were simultaneously entered into one model, adjusted for age, sex, education, living situation, and date of response.

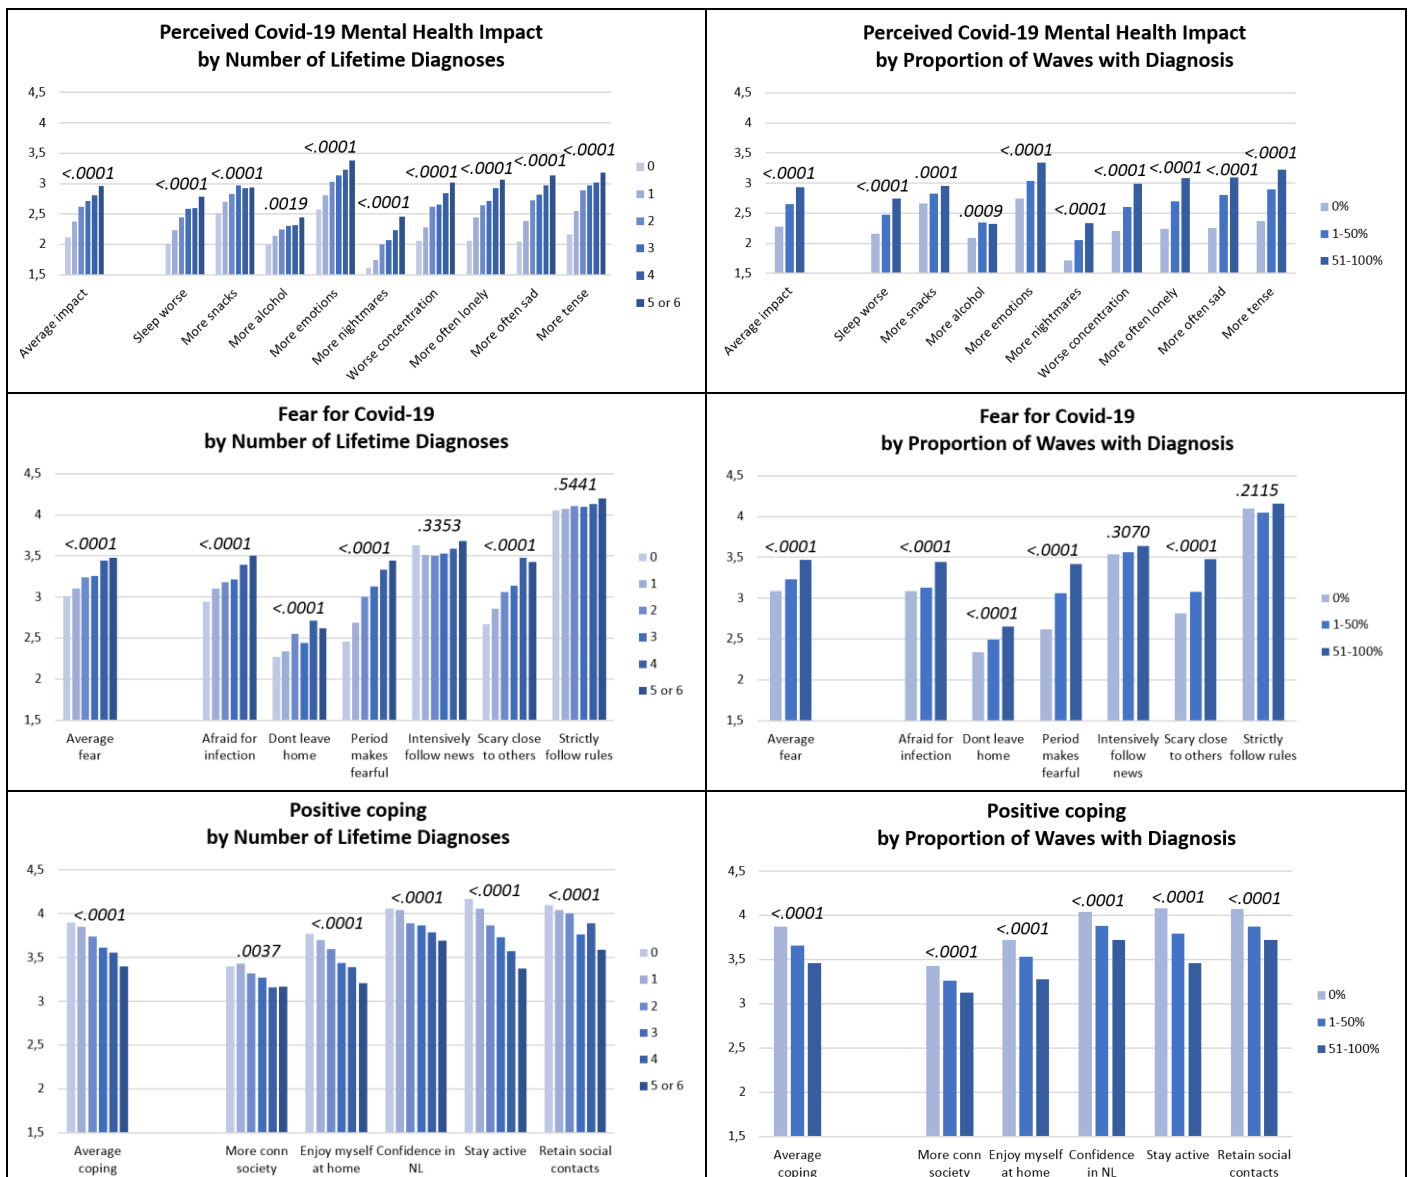

**Supplementary Figure 2: Dimensions and COVID-specific items in relation to severity (number of lifetime disorders) and chronicity (percentage of previous waves with current disorders) of mental disorders** Italic numbers are *p*-values for differences between groups, derived from Analysis of Variance

**Supplementary Table 4: Change in symptoms from before to during the COVID-19 pandemic in relation to severity (number of lifetime disorders) and chronicity (percentage of previous waves with current disorders) of mental disorders**

| Independent variable:                               | n   | Baseline mean | Covid mean | Crude change (SE) | Adjusted change (SE) | t-stat | Adjusted p-value | p-value for interaction |
|-----------------------------------------------------|-----|---------------|------------|-------------------|----------------------|--------|------------------|-------------------------|
| <b>Number of disorders in previous waves:</b>       |     |               |            |                   |                      |        |                  |                         |
| <b>Depressive symptoms (QIDS)</b>                   |     |               |            |                   |                      |        |                  |                         |
| 0 disorders (ref.)                                  | 332 | 2.59          | 3.40       | 0.82 ± 0.18       | Ref.                 |        |                  | t=-20.76<br>p < 0.0001  |
| 1 disorder                                          | 263 | 4.28          | 4.56       | 0.28 ± 0.26       | -0.54 ± 0.42         | -1.279 | 0.20             |                         |
| 2 disorders                                         | 215 | 5.42          | 5.97       | 0.55 ± 0.35       | -0.27 ± 0.44         | -0.599 | 0.55             |                         |
| 3 disorders                                         | 191 | 6.81          | 6.67       | -0.14 ± 0.41      | -0.95 ± 0.46         | -2.075 | 0.038            |                         |
| 4 disorders                                         | 175 | 7.68          | 8.18       | 0.50 ± 0.46       | -0.31 ± 0.47         | -0.663 | 0.51             |                         |
| 5 or 6 disorders                                    | 194 | 9.89          | 8.99       | -0.90 ± 0.48      | -1.72 ± 0.46         | -3.766 | 0.0002           |                         |
| <b>Anxiety symptoms (BAI)</b>                       |     |               |            |                   |                      |        |                  |                         |
| 0 disorders (ref.)                                  | 328 | 2.58          | 3.06       | 0.48 ± 0.28       | Ref.                 |        |                  | t=-7.60<br>p = 0.0058   |
| 1 disorder                                          | 271 | 4.91          | 5.35       | 0.43 ± 0.43       | -0.04 ± 0.84         | -0.053 | 0.96             |                         |
| 2 disorders                                         | 252 | 7.38          | 8.09       | 0.71 ± 0.62       | 0.23 ± 0.85          | 0.268  | 0.79             |                         |
| 3 disorders                                         | 225 | 10.04         | 9.53       | -0.51 ± 0.77      | -0.99 ± 0.88         | -1.127 | 0.26             |                         |
| 4 disorders                                         | 195 | 11.65         | 12.01      | 0.36 ± 0.93       | -0.11 ± 0.92         | -0.125 | 0.90             |                         |
| 5 or 6 disorders                                    | 205 | 17.07         | 15.72      | -1.36 ± 1.05      | -1.83 ± 0.90         | -2.022 | 0.043            |                         |
| <b>Worry symptoms (PSWQ)</b>                        |     |               |            |                   |                      |        |                  |                         |
| 0 disorders (ref.)                                  | 299 | 17.31         | 19.42      | 2.11 ± 0.56       | Ref.                 |        |                  | t=-33.63<br>p < 0.0001  |
| 1 disorder                                          | 254 | 22.60         | 23.21      | 0.62 ± 0.72       | -1.52 ± 1.05         | -1.450 | 0.15             |                         |
| 2 disorders                                         | 206 | 25.98         | 27.70      | 1.72 ± 0.93       | -0.41 ± 1.11         | -0.368 | 0.71             |                         |
| 3 disorders                                         | 186 | 29.05         | 29.67      | 0.63 ± 0.99       | -1.51 ± 1.14         | -1.324 | 0.19             |                         |
| 4 disorders                                         | 167 | 31.70         | 31.04      | -0.66 ± 1.09      | -2.81 ± 1.18         | -2.387 | 0.017            |                         |
| 5 or 6 disorders                                    | 181 | 35.32         | 33.40      | -1.92 ± 1.02      | -4.07 ± 1.15         | -3.546 | 0.0004           |                         |
| <b>Loneliness (DeJong Q)</b>                        |     |               |            |                   |                      |        |                  |                         |
| 0 disorders (ref.)                                  | 258 | 0.90          | 1.38       | 0.48 ± 0.11       | Ref.                 |        |                  | t=-14.90<br>p = 0.0001  |
| 1 disorder                                          | 232 | 1.57          | 1.88       | 0.31 ± 0.16       | -0.16 ± 0.23         | -0.719 | 0.47             |                         |
| 2 disorders                                         | 225 | 1.76          | 2.18       | 0.41 ± 0.17       | -0.06 ± 0.23         | -0.278 | 0.78             |                         |
| 3 disorders                                         | 209 | 2.48          | 2.60       | 0.12 ± 0.19       | -0.36 ± 0.23         | -1.536 | 0.12             |                         |
| 4 disorders                                         | 181 | 2.73          | 2.75       | 0.02 ± 0.21       | -0.46 ± 0.24         | -1.881 | 0.060            |                         |
| 5 or 6 disorders                                    | 183 | 3.38          | 3.20       | -0.17 ± 0.22      | -0.65 ± 0.24         | -2.693 | 0.0071           |                         |
| <b>Percentage of previous waves with disorders:</b> |     |               |            |                   |                      |        |                  |                         |
| <b>Depressive symptoms (QIDS)</b>                   |     |               |            |                   |                      |        |                  |                         |
| 0% waves with disorders (ref.)                      | 685 | 3.38          | 4.15       | 0.77 ± 0.15       | Ref.                 |        |                  | t=-37.99<br>p < 0.0001  |
| 1-50% waves with disorders                          | 383 | 6.32          | 6.41       | 0.09 ± 0.26       | -0.68 ± 0.32         | -2.136 | 0.033            |                         |
| 51-100% waves with disorders                        | 302 | 9.84          | 9.16       | -0.69 ± 0.38      | -1.45 ± 0.34         | -4.225 | < 0.0001         |                         |
| <b>Anxiety symptoms (BAI)</b>                       |     |               |            |                   |                      |        |                  |                         |
| 0% waves with disorders (ref.)                      | 700 | 3.91          | 4.52       | 0.61 ± 0.26       | Ref.                 |        |                  | t=-12.33<br>p = 0.0004  |
| 1-50% waves with disorders                          | 396 | 8.43          | 8.62       | 0.19 ± 0.49       | -0.43 ± 0.63         | -0.681 | 0.50             |                         |
| 51-100% waves with disorders                        | 380 | 15.74         | 14.80      | -0.94 ± 0.75      | -1.55 ± 0.64         | -2.418 | 0.016            |                         |
| <b>Worry symptoms (PSWQ)</b>                        |     |               |            |                   |                      |        |                  |                         |
| 0% waves with disorders (ref.)                      | 652 | 20.04         | 21.58      | 1.54 ± 0.44       | Ref.                 |        |                  | t=-21.79<br>p < 0.0001  |
| 1-50% waves with disorders                          | 363 | 29.21         | 29.34      | 0.13 ± 0.69       | -1.42 ± 0.80         | -1.782 | 0.075            |                         |
| 51-100% waves with disorders                        | 278 | 34.80         | 33.93      | -0.87 ± 0.80      | -2.42 ± 0.87         | -2.781 | 0.0055           |                         |
| <b>Loneliness (DeJong Q)</b>                        |     |               |            |                   |                      |        |                  |                         |
| 0% waves with disorders (ref.)                      | 581 | 1.23          | 1.66       | 0.43 ± 0.09       | Ref.                 |        |                  | t=-12.21<br>p = 0.0005  |
| 1-50% waves with disorders                          | 378 | 2.23          | 2.36       | 0.12 ± 0.14       | -0.30 ± 0.16         | -1.847 | 0.065            |                         |
| 51-100% waves with disorders                        | 329 | 3.23          | 3.20       | -0.03 ± 0.16      | -0.46 ± 0.17         | -2.658 | 0.0079           |                         |

The baseline mean refers to the mean of average score across the preceding pre-COVID waves. The Covid mean refers to the mean score at the online COVID wave. The crude change refers to the difference in mean score between pre-COVID wave and online COVID wave. To create the forest plot, each change in symptom score was standardised. The adjusted change with the p-value was derived from mixed models where the interaction term of mental disorder status with time was entered, adjusted for age, sex, education, living situation, and date of response.
